# Supplementary material for: SECIMTools: a suite of metabolomics data analysis tools
Source: PubMed Central journal article supplement (PMC5910624; doi:10.1186/s12859-018-2134-1), 2018-04-20
Supplement: 12859_2018_2134_MOESM3_ESM.pdf [file 12859_2018_2134_MOESM3_ESM.pdf]

# Penalized Mahalanobis Distance

## Theoretical Justification

Let  $\mathbf{X}$  be  $n \times p$  dimensional matrix with  $n > p$ . The primary interest is the distances between the columns of the matrix  $\mathbf{X}$  using the correlation structure between the rows of the matrix  $\mathbf{X}$ . The singular value decomposition (SVD) for  $\mathbf{X}$  has the form  $\mathbf{USV}^T$ . Here  $\mathbf{UU}^T = \mathbf{I}$  and  $\mathbf{VV}^T = \mathbf{I}$  are the orthogonal matrices of dimension  $n \times n$  and  $p \times p$  respectively. The matrix  $\mathbf{S}$  has dimension  $n \times p$  and has non-zero elements only on diagonal when row indexes are equal to column indexes. The rank of  $\mathbf{S}$  is equal to the rank of  $\mathbf{X}$ . Also let  $\mathbf{XX}^T = \mathbf{UDU}^T$  be a spectral decomposition (SD) of  $\mathbf{XX}^T$ . The matrix  $\mathbf{D}$  is a square diagonal matrix with dimension  $n \times n$ . The relationship between two decompositions is the following:

$$\mathbf{XX}^T = [\mathbf{USV}^T][\mathbf{USV}^T]^T = \mathbf{USV}^T\mathbf{VS}^T\mathbf{U}^T = \mathbf{USS}^T\mathbf{U}^T = \mathbf{UDU}^T \quad (1)$$

Since  $n > p$ , the number of non-zero diagonal elements can be at most  $p$ . The relationship between two decompositions imply  $\mathbf{SS}^T = \mathbf{D}$ . The diagonal elements in  $\mathbf{S}$  are not defined uniquely since the sign in SVD can be arbitrary. The diagonal elements of  $\mathbf{D}$  however are defined uniquely and are all non-negative for non-negative definite matrices such as  $\mathbf{XX}^T$ . We use the notations  $d_i$  and  $s_i^2$  where  $i = 1, 2, \dots, n$  for diagonal elements of  $\mathbf{D}$  and  $\mathbf{SS}^T$  respectively. The values  $|s_i|$  are called singular values of the matrix  $\mathbf{X}$  and they are related to eigenvalues  $d_i$  of matrix  $\mathbf{XX}^T$  using relationship  $d_i = s_i^2$ .

If we assume that matrix  $\mathbf{XX}^T$  is invertible (i.e.  $n < p$  and row space has a full rank, which is *not* the case for our matrix) then all  $d_i$ -s are positive and the inverse matrix  $[\mathbf{XX}^T]^{-1}$  has the form

$$[\mathbf{XX}^T]^{-1} = \mathbf{UD}^{-1}\mathbf{U}^T = \mathbf{U}[\mathbf{SS}^T]^{-1}\mathbf{U}^T \quad (2)$$

where

$$\begin{aligned} \mathbf{D}^{-1} &= \text{diag} \left[ \frac{1}{d_1}, \frac{1}{d_2}, \dots, \frac{1}{d_n} \right] \\ [\mathbf{S}\mathbf{S}^T]^{-1} &= \text{diag} \left[ \frac{1}{s_1^2}, \frac{1}{s_2^2}, \dots, \frac{1}{s_n^2} \right] \end{aligned}$$

For the considered matrix  $\mathbf{X}$  with dimensions  $n \times p$  with  $n > p$  the matrix  $\mathbf{X}\mathbf{X}^T$  does not have a full rank and is *not* invertible. In this case the SVD decomposition of the inverse (2) does not make sense.

To fix that the penalty is introduced. The idea is to add penalty to the original matrix  $\mathbf{X}\mathbf{X}^T$  to make it invertible. The suggested matrix is  $\mathbf{X}\mathbf{X}^T + \lambda\mathbf{I}$  and the corresponding inverse has the form

$$\begin{aligned} [\mathbf{X}\mathbf{X}^T + \lambda\mathbf{I}]^{-1} &= [\mathbf{U}\mathbf{D}\mathbf{U}^T + \mathbf{U}(\lambda\mathbf{I})\mathbf{U}^T]^{-1} \\ &= \mathbf{U} \left[ \text{diag} \left[ \frac{1}{d_1 + \lambda}, \frac{1}{d_2 + \lambda}, \dots, \frac{1}{d_n + \lambda} \right] \right] \mathbf{U}^T \\ &= \mathbf{U} \left[ \text{diag} \left[ \frac{1}{s_1^2 + \lambda}, \frac{1}{s_2^2 + \lambda}, \dots, \frac{1}{s_n^2 + \lambda} \right] \right] \mathbf{U}^T \end{aligned}$$

The matrix  $\mathbf{X}\mathbf{X}^T + \lambda\mathbf{I}$  is invertible and the inverse  $[\mathbf{X}\mathbf{X}^T + \lambda\mathbf{I}]^{-1}$  exists provided  $\lambda \neq 0$ . The question is how to select appropriate penalty  $\lambda$ ? Intuitively, the smallest eigenvalues  $d_i$  are the least important ones. Those values experience maximal shrinkage  $d_i$  and the largest values of  $\frac{1}{d_i}$  which degenerates to  $\infty$  when  $d_i = 0$ . To follow the logic the reasonable choose is to shrink based on the smallest  $d_i$  in the dataset which is *not* equal to 0. That implies

$$\lambda := \min \{d_i : d_i \neq 0\}.$$

The approach tends to produce the results when all distances become very similar i.e. the penalty is too severe to see the difference b/w the samples. The more general alternative will be to use some rescaling

$$\lambda := \min \{d_i\gamma : d_i \neq 0\}$$

where scaling constant  $\gamma \in (0; 1]$ . The suggested choice is to use the median  $\tilde{d}$  of all non-zero eigenvalues as a penalty:

$$\lambda := \tilde{d} = \text{median} \{d_i : d_i \neq 0\}.$$

## Suggested Computation Algorithm

The algorithm has to be outlined as follows.

1. Standardize the matrix  $\mathbf{X}$  for variance computation i.e. compute the differences  $[\mathbf{X} - \bar{\mathbf{X}}_R]$  where  $\bar{\mathbf{X}}_R$  is  $n \times p$  dimensional matrix where every element is replaced by row average of the original matrix  $\mathbf{X}$ .
2. Compute singular value decomposition of  $[\mathbf{X} - \bar{\mathbf{X}}_R]$ . The decomposition has the form

$$[\mathbf{X} - \bar{\mathbf{X}}_R] = \mathbf{U}_c \mathbf{S}_c \mathbf{V}_c^T \quad (3)$$

where subscript  $c$  emphasizes that it is for the *centered* matrix  $[\mathbf{X} - \bar{\mathbf{X}}_R]$ . The variance estimate has the form

$$\hat{\Sigma} = \widehat{\text{Var}(\mathbf{X})} = \frac{1}{p-1} [\mathbf{X} - \bar{\mathbf{X}}_R][\mathbf{X} - \bar{\mathbf{X}}_R]^T$$

3. Define the penalty  $\lambda := \min\{d_i \gamma : d_i \neq 0\}$  where  $\gamma$  is a user-defined penalty parameter and  $d_i$ -s are diagonal elements of  $\mathbf{D}_c = \mathbf{S}_c \mathbf{S}_c^T$ .
4. Compute the estimate of the penalized sigma  $\hat{\Sigma}_\lambda^{-1}$

$$\begin{aligned} \hat{\Sigma}_\lambda^{-1} &= (p-1) [([\mathbf{X} - \bar{\mathbf{X}}_R][\mathbf{X} - \bar{\mathbf{X}}_R]^T + \lambda \mathbf{I})^{-1}] \\ &= (p-1) \mathbf{U}_c \left[ \text{diag} \left[ \frac{1}{d_1 + \lambda}, \frac{1}{d_2 + \lambda}, \dots, \frac{1}{d_n + \lambda} \right] \right] \mathbf{U}_c^T \end{aligned} \quad (4)$$

5. Compute the Mahalanobis distance using the penalized estimate (4). The Mahalanobis distance for individual columns  $\mathbf{X}_1$  and  $\mathbf{X}_2$  of  $\mathbf{X}$  is denoted as  $\hat{d}_M(\mathbf{X}_1, \mathbf{X}_2)$  and has

the form

$$\hat{d}_M(\mathbf{X}_1, \mathbf{X}_2) = \sqrt{[\mathbf{X}_1 - \mathbf{X}_2]^T \hat{\Sigma}_\lambda^{-1} [\mathbf{X}_1 - \mathbf{X}_2]} \quad (5)$$
